# Supplementary material for: Controller design and experimental validation of walking for a musculoskeletal bipedal lower limb robot based on the spring-loaded inverted pendulum model
Source: PubMed Central journal article supplement (PMC11574207; doi:10.3389/frobt.2024.1449721), 2024-11-05
Supplement: DataSheet1.pdf [file DataSheet1.pdf]

## Supplementary Material

### 1 SUPPLEMENTARY TABLES AND FIGURES

#### 1.1 Tables

**Table S1.** Arrangement of the PAMs

| no. | PAM length (mm) | tube length (mm) | function        |
|-----|-----------------|------------------|-----------------|
| #1  | 310             | 260              | hip extension   |
| #2  | 360             | 310              | hip flexion     |
| #3  | 344             | 250              | knee flexion    |
| #4  | 350             | 300              | knee extension  |
| #5  | 380             | 280              | ankle extension |
| #6  | 396             | 270              | ankle flexion   |

**Table S2.** Comparison of Joint Range of Motion Between Robot and Human

| Joint range of motion | Robot (flexion / extension) | Human (flexion / extension) |
|-----------------------|-----------------------------|-----------------------------|
| Hip joint pitch       | +10 ~ -10°                  | +20 ~ -20°                  |
| Knee joint pitch      | +50 ~ 0°                    | +60 ~ 0°                    |
| Ankle joint pitch     | +30 ~ -15°                  | +20 ~ -5°                   |
